# Supplementary material for: Bile acid biosynthesis in Smith-Lemli-Opitz syndrome bypassing cholesterol: Potential importance of pathway intermediates
Source: PubMed Central journal article supplement (PMC7816163; doi:10.1016/j.jsbmb.2020.105794), 2021-02
Supplement: mmc2.pdf [file mmc2.pdf]

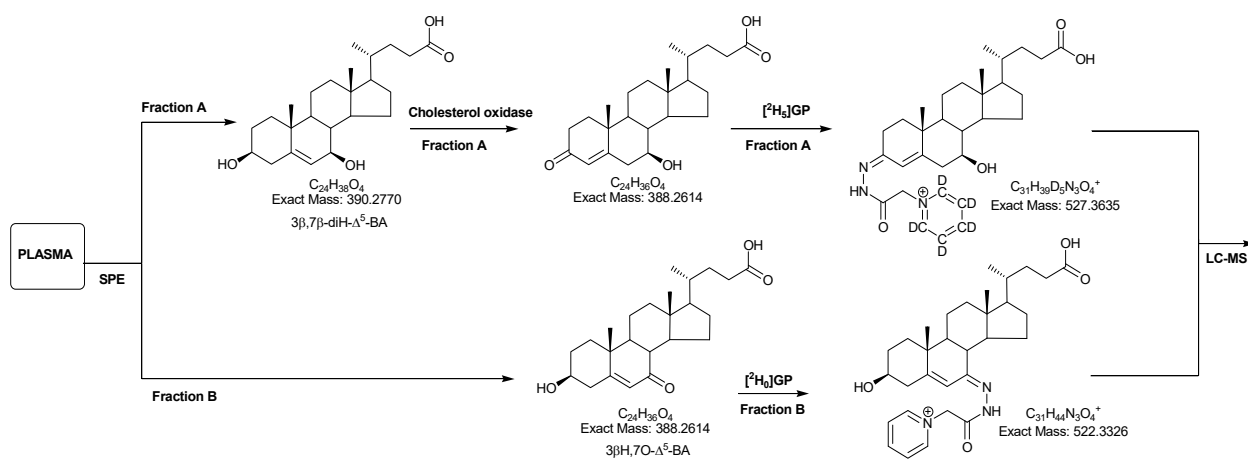

Figure S1. Principles of charge-tagging exemplified for  $3\beta,7\beta\text{-diH-}\Delta^5\text{-BA}$  and  $3\beta\text{H},7\text{O-}\Delta^5\text{-BA}$ .

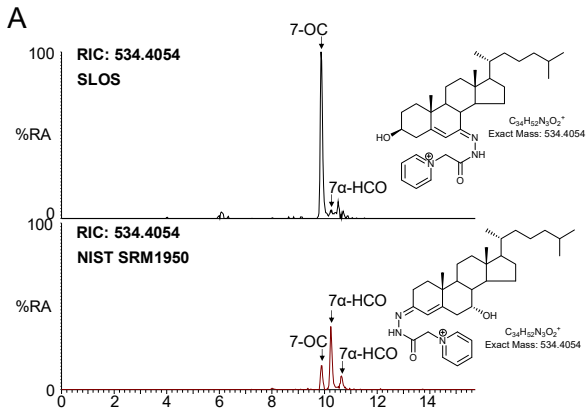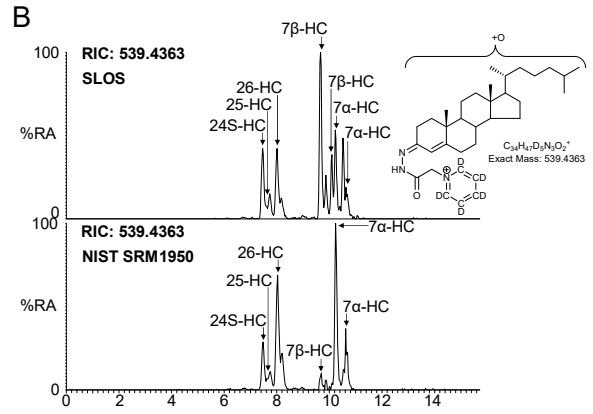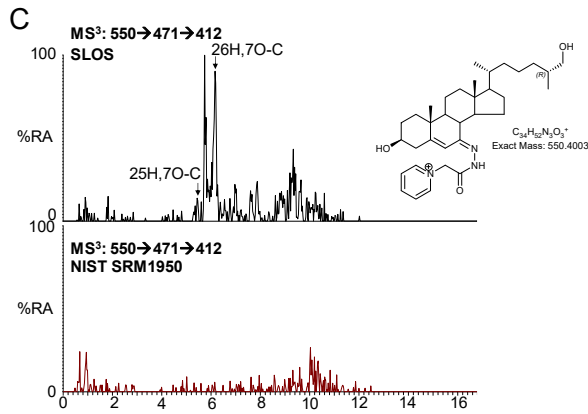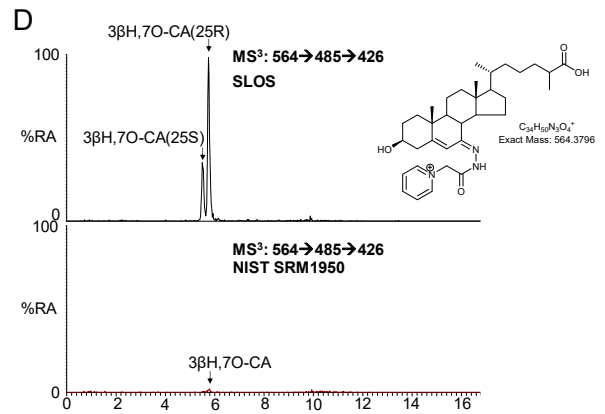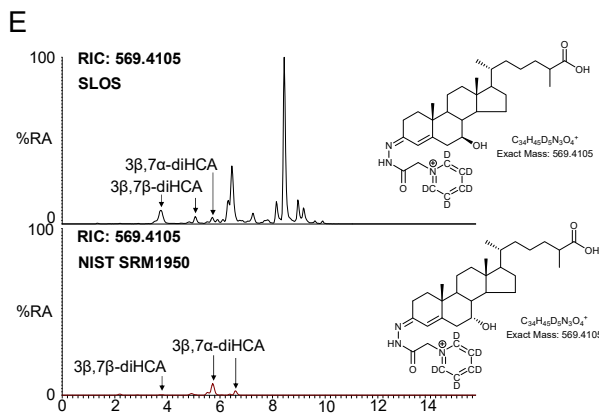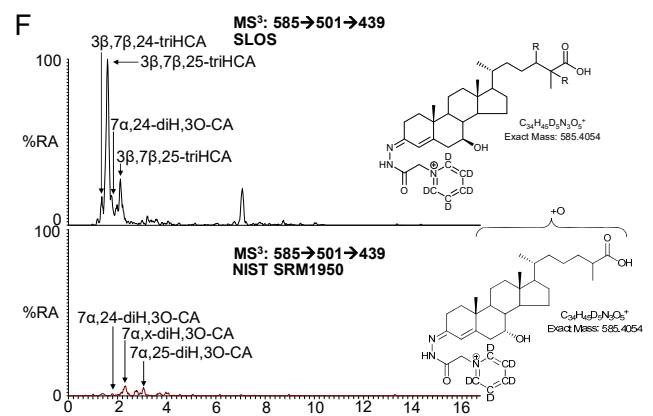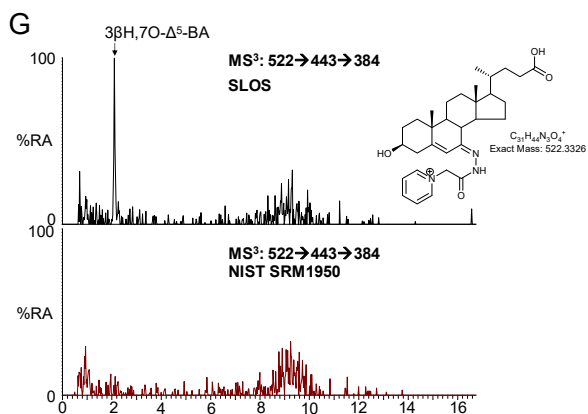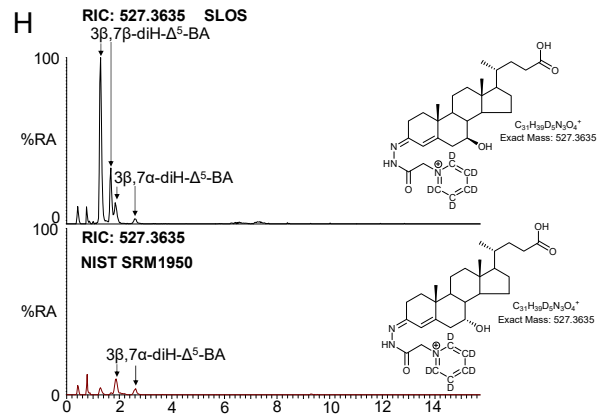

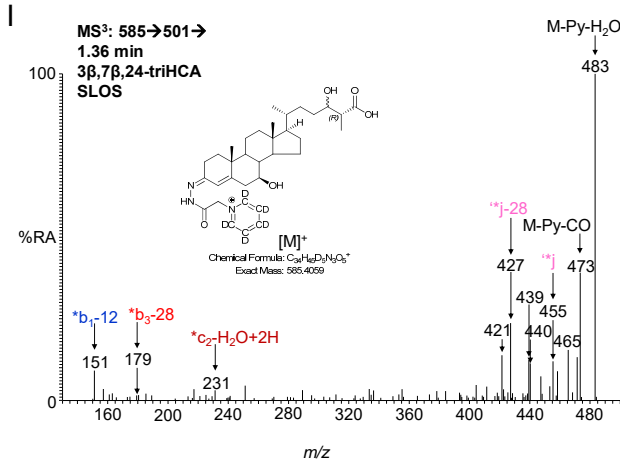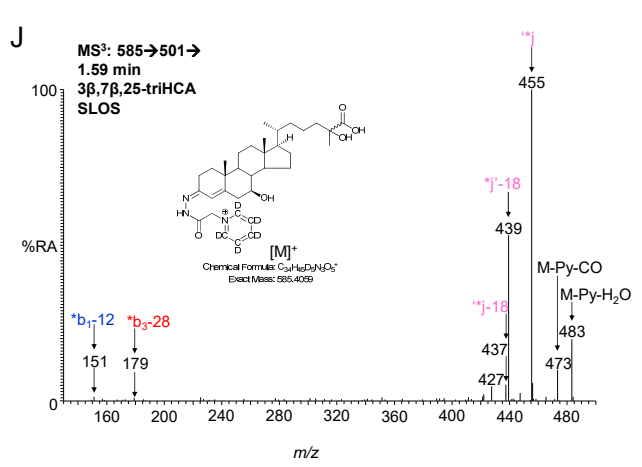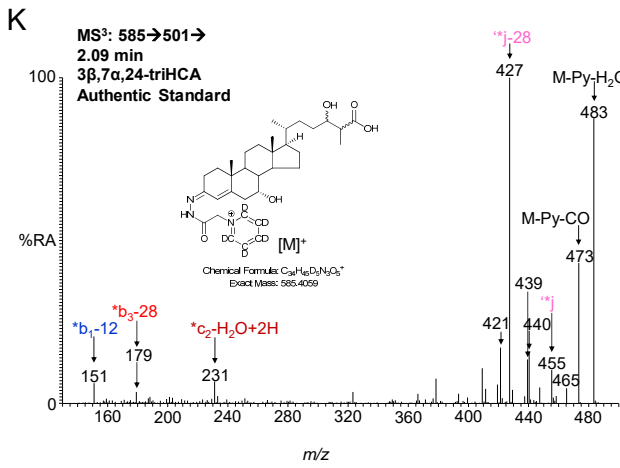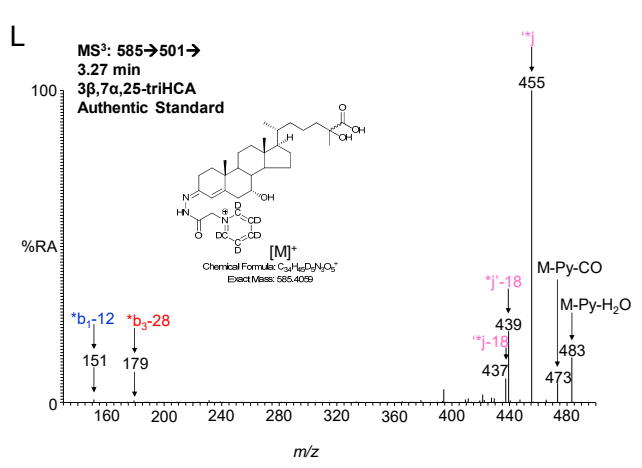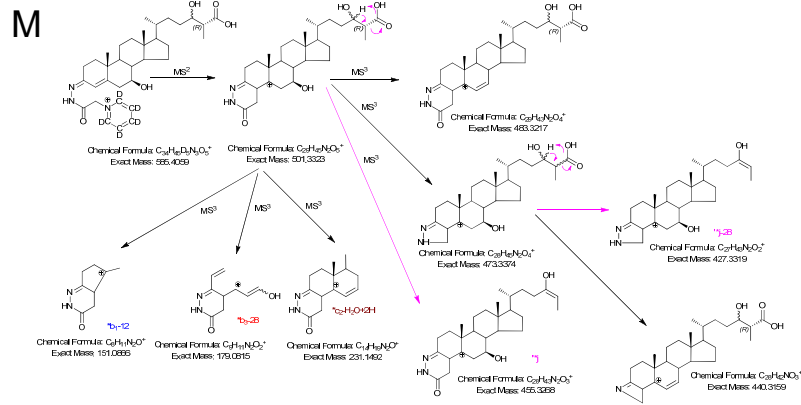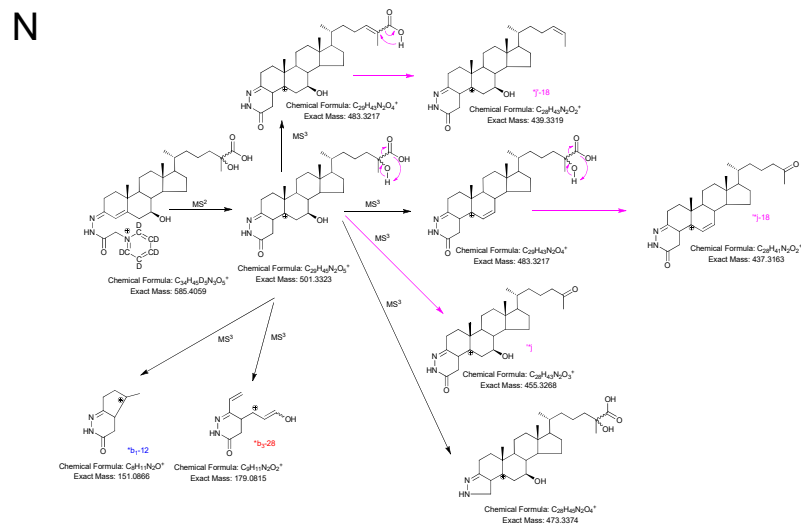

Figure S2. LC-MS( $MS^n$ ) analysis of oxysterols, including  $C_{24}$  and  $C_{27}$  acids, in plasma. Data was generated on a hybrid LIT-Orbitrap. Samples prepared in the presence of cholesterol oxidase utilised the  $[^2H_5]GP$  derivatisation reagent resulting in odd  $m/z$  molecular ions, samples prepared in the absence of cholesterol oxidase utilised  $[^2H_0]GP$  reagent resulting in even  $m/z$  molecular ions. Upper panels are for an SLOS plasma sample, lower panels are for the NIST SRM 1950 (1). Upper and lower panels are shown on the same y-axis. GP derivatives give *syn* and *anti* conformers, which may or may not be resolved. (A) Reconstructed ion chromatogram (RIC) of  $m/z$   $534.4054 \pm 10$  ppm corresponding to 7-OC and  $7\alpha$ -hydroxycholest-4-en-3-one ( $7\alpha$ -HCO). Samples were prepared in the absence of cholesterol oxidase. (B) RIC of  $m/z$   $539.4363 \pm 10$  ppm corresponding to monohydroxycholesterols (HC). Samples were prepared in the presence of cholesterol oxidase. (C)  $MS^3$  multiple reaction monitoring transition (MRM)  $550 \rightarrow 471 \rightarrow 412$  characteristic of 26H,7O-C. Samples were prepared in the absence of cholesterol oxidase. (D)  $MS^3$  MRM  $564 \rightarrow 485 \rightarrow 426$  characteristic of  $3\beta$ H,7O-CA. Note, both 25R and 25S-epimers are resolved. Samples were prepared in the absence of cholesterol oxidase. (E) RIC of  $m/z$   $569.4105 \pm 10$  ppm corresponding to dihydroxycholestenoic acids (diHCA). Samples were prepared in the presence of cholesterol oxidase. (F)  $MS^3$  MRM  $585 \rightarrow 501 \rightarrow 439$  characteristic of the trihydroxycholestenoic acids (triHCA)  $3\beta,7,24$ (or25)-triHCA. Samples were prepared in the presence of cholesterol oxidase. (G)  $MS^3$  MRM  $522 \rightarrow 443 \rightarrow 384$  characteristic of  $3\beta$ H,7O- $\Delta^5$ -BA. Samples were prepared in the absence of cholesterol oxidase. (H) RIC of  $m/z$   $527.3635 \pm 10$  ppm corresponding to dihydroxycholenoic (diH- $\Delta^5$ -BA) and hydroxyoxocholenoic acids. Samples were prepared in the presence of cholesterol oxidase.  $MS^3$  ( $[M]^+ \rightarrow [M-Py]^+ \rightarrow$ ) spectra of (I)  $3\beta,7\beta,24$ -triHCA, (J)  $3\beta,7\beta,25$ -triHCA, both from SLOS plasma, and authentic standards (K)  $3\beta,7\alpha,24$ -triHCA and (L)  $3\beta,7\alpha,25$ -triHCA. Fragmentation patterns of (M)  $3\beta,7\beta,24$ -triHCA and (N)  $3\beta,7\beta,25$ -triHCA. Details of the fragmentation pathways of 7-oxo compounds in (C), (D) and (G) can be found in reference (2).

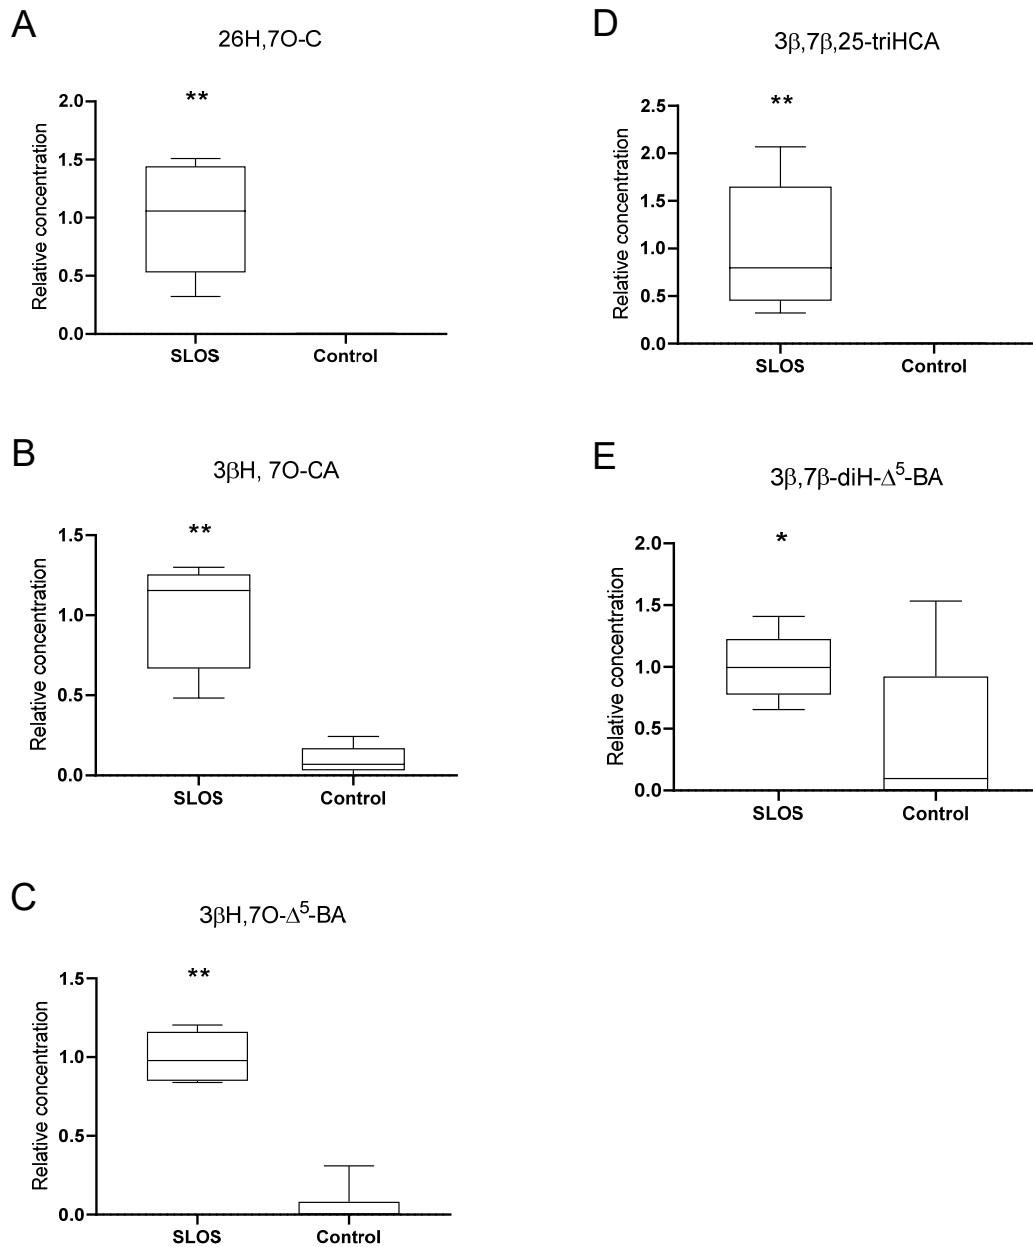

Figure S3. Relative concentrations of 26-hydroxy-7-oxocholesterol and 7β-hydroxy- and 7-oxo- C<sub>24</sub> and C<sub>27</sub> acids in amniotic fluid from SLOS affected pregnancies (n = 5) and healthy pregnancies (n = 12). (A) 26H,7O-C. (B) 3βH,7O-CA. (C) 3βH,7O-Δ<sup>5</sup>-BA. (D) 3β,7β,25-triHCA. (E) 3β,7β-diH-Δ<sup>5</sup>-BA. For each analyte relative concentrations were determined against [<sup>2</sup>H<sub>7</sub>]24R/S-HC internal standard and normalised to the mean value for SLOS set to 1. Statistical comparisons are made as described in the caption to Figure 2.

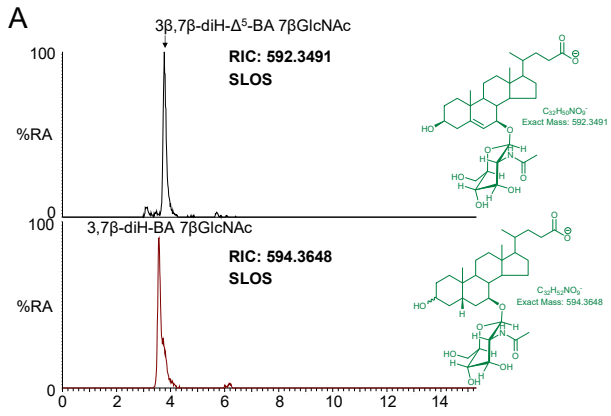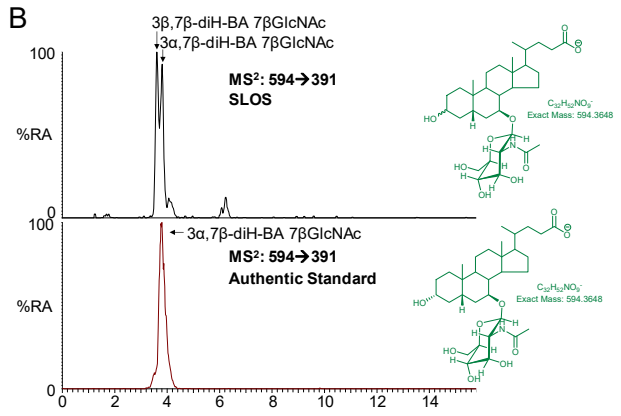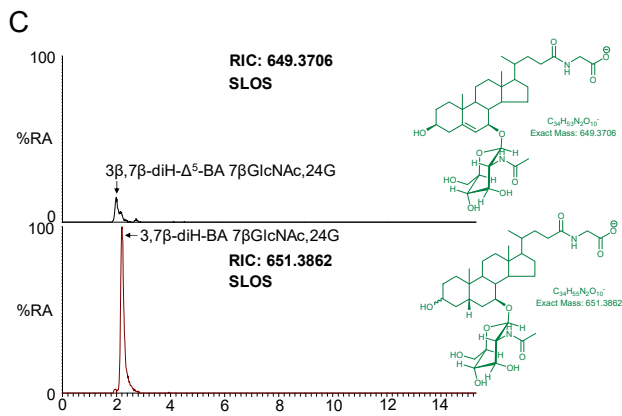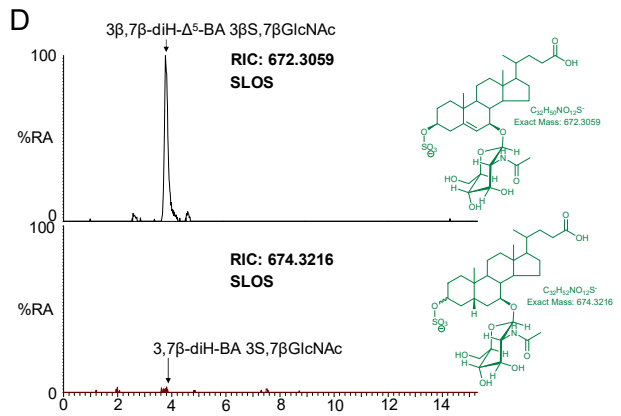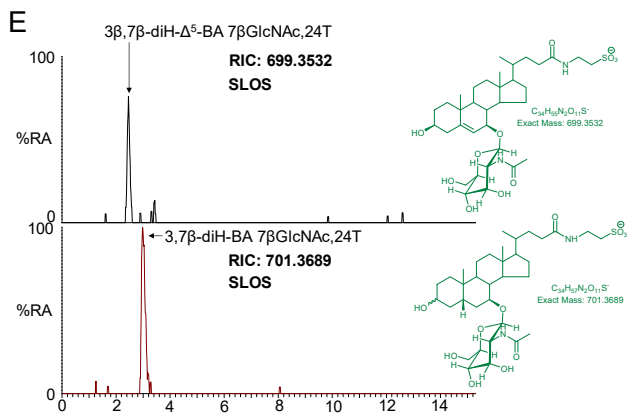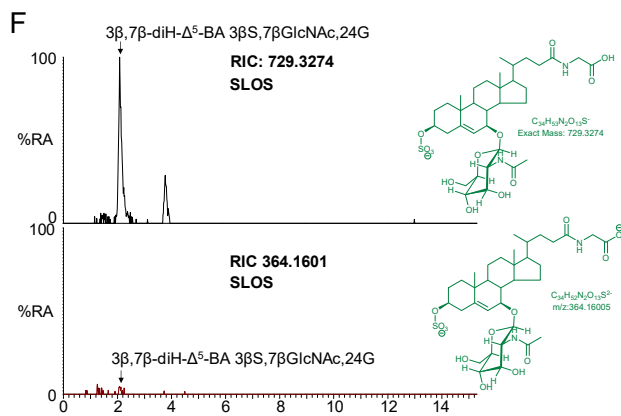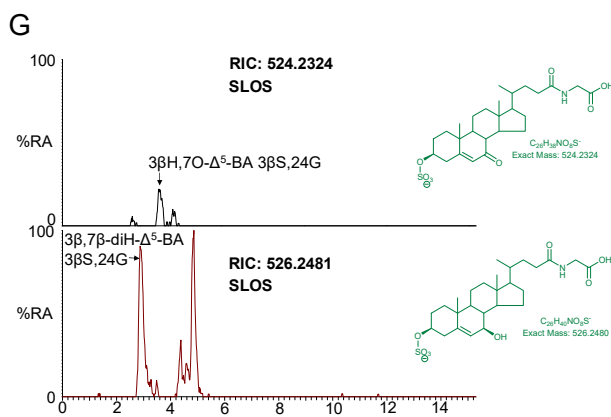

Figure S4. LC-MS( $MS^n$ ) analysis of GlcNAc conjugated bile acids in SLOS urine. Data was generated on a hybrid LIT-Orbitrap in the negative-ion mode.  $RIC \pm 10$  ppm are of  $[M-H]^-$  ions (unless stated otherwise). Upper and lower panels are shown on the same y-axis. (A) RIC of  $m/z$  592.3491 (upper panel) and 594.3648 (lower panel) corresponding to  $3\beta,7\beta$ -diH- $\Delta^5$ -BA  $7\beta$ GlcNAc and  $3,7\beta$ -diH-BA  $7\beta$ GlcNAc, respectively. (B)  $MS^2$  MRM  $594 \rightarrow 391$  characteristic of  $3,7\beta$ -diH-BA  $7\beta$ GlcNAc. The upper panel shows partial separation of  $3\alpha,7\beta$ -diH-BA  $7\beta$ GlcNAc from the  $3\beta$ -epimer in an SLOS sample. The lower panel shows  $3\alpha,7\beta$ -diH-BA  $7\beta$ GlcNAc authentic standard. (C) RIC of  $m/z$  649.3706 (upper panel) and  $m/z$  651.3862 (lower panel) corresponding to  $3\beta,7\beta$ -diH- $\Delta^5$ -BA  $7\beta$ GlcNAc,24G and  $3,7\beta$ -diH-BA  $7\beta$ GlcNAc,24G, respectively. (D) RIC of  $m/z$  672.3059 (upper panel) and  $m/z$  674.3216 (lower panel) corresponding to  $3\beta,7\beta$ -diH- $\Delta^5$ -BA  $3\beta$ S, $7\beta$ GlcNAc and  $3,7\beta$ -diH-BA  $3S,7\beta$ GlcNAc, respectively. (E) RIC of  $m/z$  699.3532 (upper panel) and  $m/z$  701.3689 (lower panel) corresponding to  $3\beta,7\beta$ -diH- $\Delta^5$ -BA  $7\beta$ GlcNAc,24T and  $3,7\beta$ -diH-BA  $7\beta$ GlcNAc,24T, respectively. (F) RIC of  $m/z$  729.3274 (upper panel) and  $m/z$  364.1601 (lower panel) corresponding to  $3\beta,7\beta$ -diH- $\Delta^5$ -BA  $3\beta$ S, $7\beta$ GlcNAc,24G as  $[M-H]^-$  and  $[M-2H]^{2-}$  ions, respectively. (G) RIC of  $m/z$  524.2324 (upper panel) and  $m/z$  526.2481 (lower panel) corresponding to  $3\beta$ H, $7O$ - $\Delta^5$ -BA  $3\beta$ S,24G and  $3\beta,7\beta$ -diH- $\Delta^5$ -BA  $3\beta$ S,24G, respectively.

1. Quehenberger, O., A. M. Armando, A. H. Brown, S. B. Milne, D. S. Myers, A. H. Merrill, S. Bandyopadhyay, K. N. Jones, S. Kelly, R. L. Shaner, C. M. Sullards, E. Wang, R. C. Murphy, R. M. Barkley, T. J. Leiker, C. R. Raetz, Z. Guan, G. M. Laird, D. A. Six, D. W. Russell, J. G. McDonald, S. Subramaniam, E. Fahy, and E. A. Dennis. 2010. Lipidomics reveals a remarkable diversity of lipids in human plasma. *J Lipid Res* **51**: 3299-3305.
2. Griffiths, W. J., I. Gilmore, E. Yutuc, J. Abdel-Khalik, P. J. Crick, T. Hearn, A. Dickson, B. W. Bigger, T. H. Wu, A. Goenka, A. Ghosh, S. A. Jones, and Y. Wang. 2018. Identification of unusual oxysterols and bile acids with 7-oxo or 3beta,5alpha,6beta-trihydroxy functions in human plasma by charge-tagging mass spectrometry with multistage fragmentation. *J Lipid Res* **59**: 1058-1070.
